# Supplementary material for: Flaky cobalt phosphide-modified manganese iron oxide as a highly efficient OER catalyst
Source: Royal Society of Chemistry journal article supplement (doi:10.1039/d1nj01587g), 2021-01-01
Supplement: d1nj01587g1.pdf [file d1nj01587g1.pdf]

## Flaky Cobalt Phosphide Modified Manganese Iron Oxide as a Highly Efficient OER Catalyst

Shumei Li<sup>#</sup>, Xiang Lei<sup>#,\*</sup>, Huixia Hu, Liwen Fu, Ruzheng Peng, Haiping Huang and  
Jinliang Wang<sup>\*</sup>

<sup>\*</sup>Corresponding author

<sup>#</sup>These two authors are contributed equally to this work.

Faculty of Materials Metallurgy and Chemistry, Jiangxi University of Science  
and Technology, Gan Zhou 341000, P.R. China

E-mail address: xianglei108@sina.com

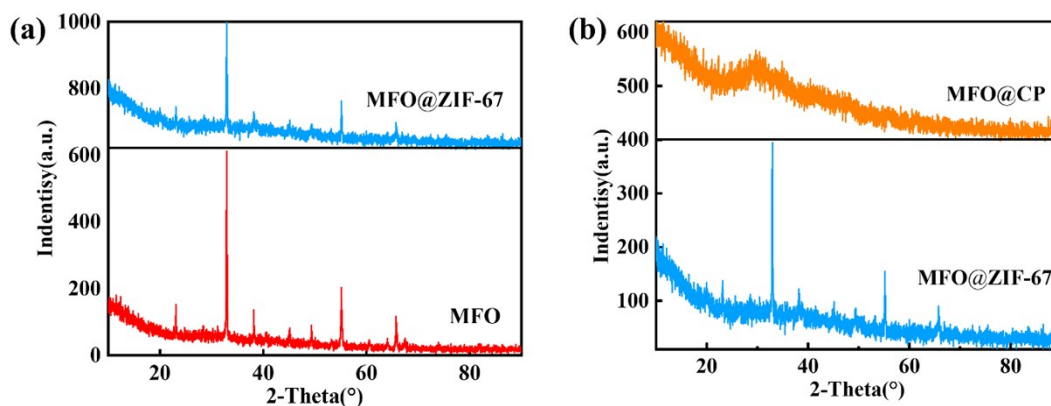

Fig. S1 The XRD patterns (a) MFO@ZIF-67 and MFO; (b) MFO and MFO@CP

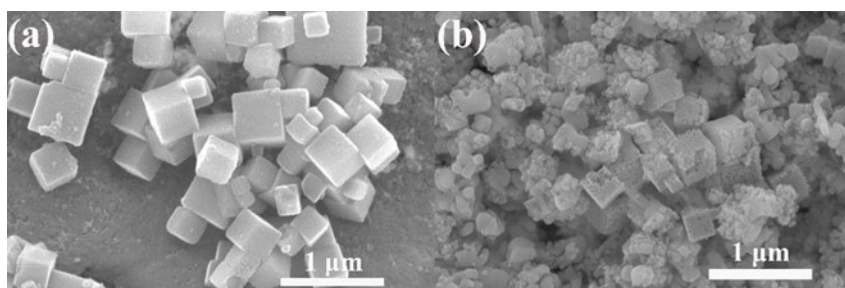

Fig. S2 SEM images (a) Mn<sub>3</sub>[Fe(CN)<sub>6</sub>]<sub>2</sub>·nH<sub>2</sub>O; (b) MFO.

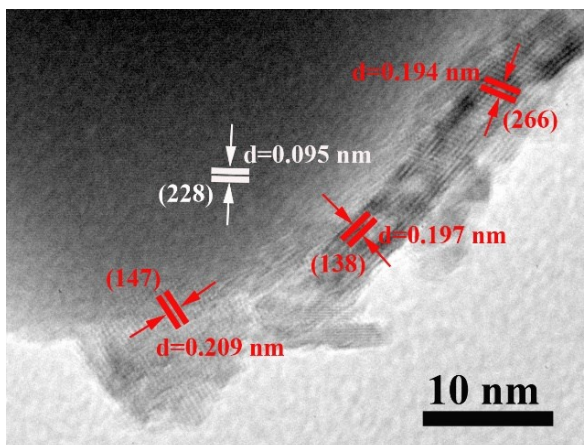

Fig. S3 HRTEM images of MFO@ZIF-67

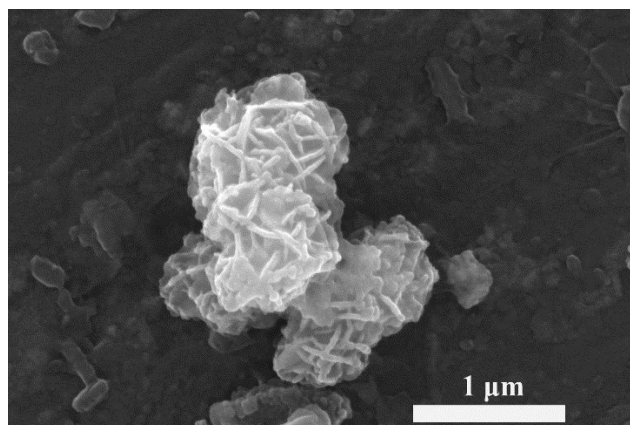

Fig. S4 SEM images of MFO@CP

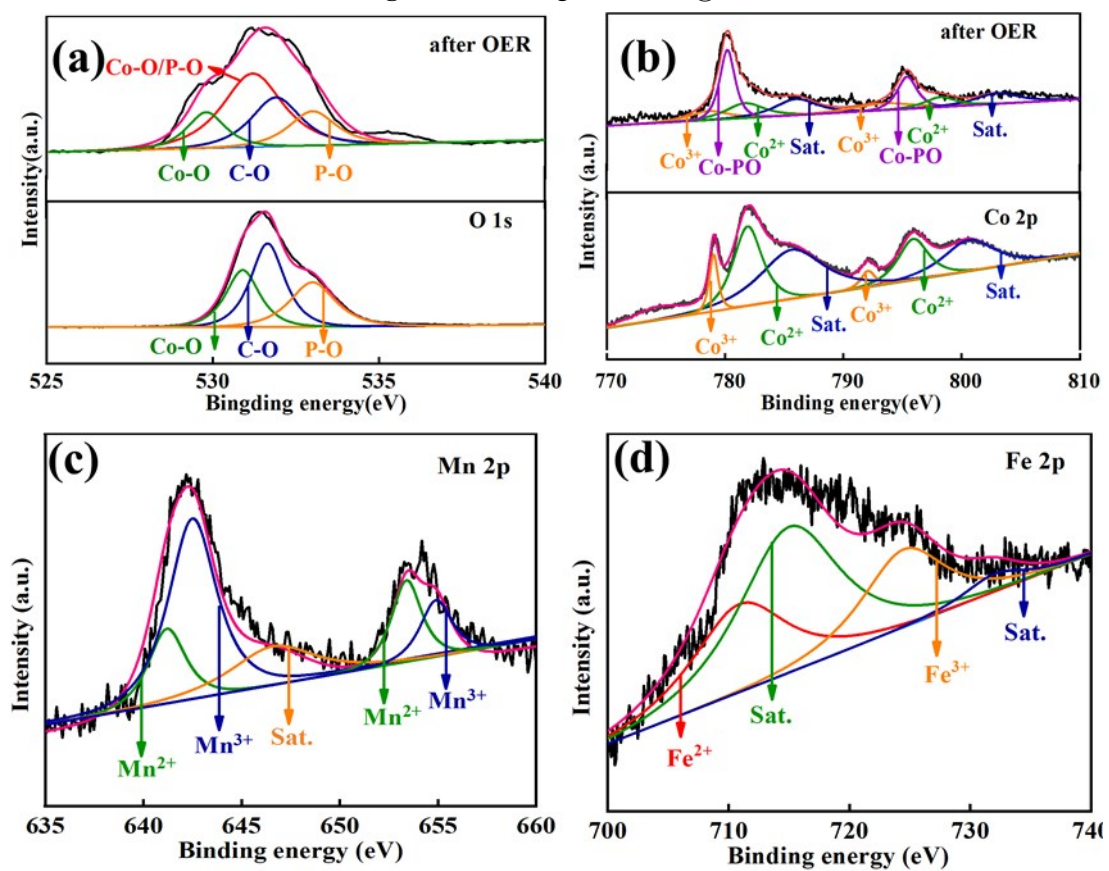

Fig. S5 The XPS spectra of MFO@CP after OER (a) O 1s; (b) Co 2p; (c) Mn 2p; (d) Fe 2p

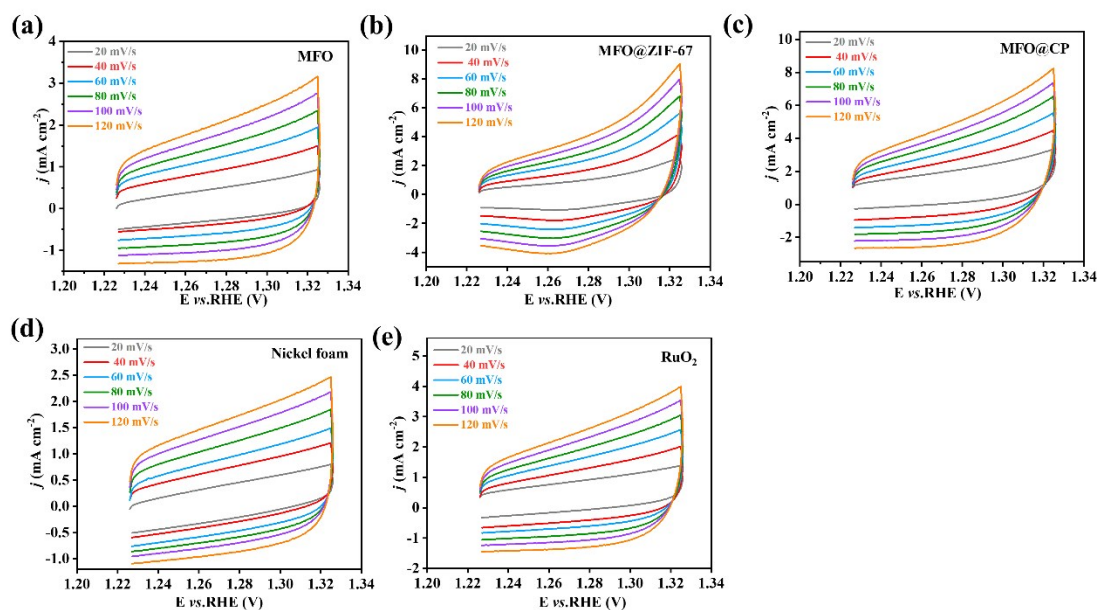

**Fig. S6** CV curves of samples at various scan rates from 20 to 120 mVs<sup>-1</sup> in 1.2-1.34 V vs

**Table S1.** Comparison of catalytic performance of the recently reported catalysts for OER in 1M KOH.

| Catalyst                                             | $\eta_{50}$ (mV) | $\eta_{100}$ (mV) | Tafel slope (mV dec <sup>-1</sup> ) | Ref.      |
|------------------------------------------------------|------------------|-------------------|-------------------------------------|-----------|
| MFO@CP                                               | 320              | 340               | 65.57                               | This work |
| Co/Fe 32                                             | 430              | 455               | 55                                  | 1         |
| P-NiFe <sub>2</sub> O <sub>4</sub>                   | 320              | 370               | 49                                  | 2         |
| NP-NiFe <sub>2</sub> O <sub>4</sub> /SWNTs           | 340              | 390               | 83.6                                | 3         |
| NiFe <sub>2</sub> O <sub>4</sub> /NiFeP-2            | 338              | -                 | 119                                 | 4         |
| CoF-3                                                | 465              | -                 | 72                                  | 5         |
| OP-NiFe <sub>2</sub> O <sub>4</sub> /NCNF            | 330              | -                 | 44.8                                | 6         |
| NiFeMnLDH/PPy/RGO                                    | 410              | -                 | 72                                  | 7         |
| CoFe <sub>2</sub> O <sub>4</sub>                     | 330              | 370               | 58.6                                | 8         |
| NiFe <sub>2</sub> O <sub>4</sub> -Ar-30              | 230              | 250               | 39.2                                | 9         |
| Ce <sub>0.2</sub> MnFe <sub>1.8</sub> O <sub>4</sub> | 410              | -                 |                                     | 10        |
| CoFe <sub>2</sub> O <sub>4</sub>                     | 500              | 580               | 61                                  | 11        |
| Ni-NiFe <sub>2</sub> O <sub>4</sub> @C               | 250              | 270               | 51                                  | 12        |

### References:

1. E. Budiyo, M. Yu, M. Chen, S. DeBeer, O. Rüdiger and H. Tüysüz, *ACS. Appl. Energy. Mater.*, 2020, **3**, 8583-8594.
2. Q. Chen, R. Wang, F. Lu, X. Kuang, Y. Tong and X. Lu, *ACS. Omega*, 2019, **4**, 3493-3499.
3. H. S. J. Z. Mengfei Fei and A. F. Y. Hui Li, *ChemCatChem*, 2018, **13**, 287-288.

4. W. H. L. X. Xin Li, S. M. Y. W. Zhang and G. Huang, *ChemElectroChem*, 2020, **13**, 287-288.
5. B. Debnath, S. Parvin, H. Dixit and S. Bhattacharyya, *ChemSusChem*, 2020.
6. A. Wei Zong, B. Dewei Rao, H. G. A, Y. O. A, Y. M. A, W. W. C, J. W. D and F. L. E. A. A, *Nanoscale*, 2020, 10977-10986.
7. X. Jia, Y. Zhang, L. Zhang, L. Wang and L. Zhou, *Ionics*, 2020, **26**, 991-1001.
8. D. Guo, H. Kang, P. Wei, Y. Yang, Z. Hao, Q. Zhang and L. Liu, *Crystengcomm*, 2020, **22**, 4317-4323.
9. X. Z. L. Z. Xiaokang Chen, *Chem. Asian J.*, 2020, **15**,3995-3999.
10. T. Pandiarajan, L. John Berchmans and S. Ravichandran, *Rsc. Adv.*, 2015, **5**, 34100-34108.
11. C. Mahala, M. D. Sharma and M. Basu, *Electrochim. Acta*, 2018, **273**, 462-473.
12. J. Zhang, Y. Jiang, Y. Wang, C. Yu, J. Cui, J. Wu, X. Shu, Y. Qin, J. Sun, J. Yan, H. Zheng, Y. Zhang and Y. Wu, *Electrochim. Acta*, 2019, **321**, 134652.
